# Supplementary material
Source: ML conference proceedings conference paper supplement (https://openaccess.thecvf.com/content/CVPR_2019/html/Takeda_Video_Magnification_in_CVPR_2019_paper.html)
Supplement: Supplementary file 1 [file Proof_for_equiation(4)_in_our_paper.pdf › 0435-supp/Proof_for_equiation(4)_in_our_paper.pdf]

# Fractional Anisotropy (FA)

## 1 Definition of FA

FA is used in neuroscience to evaluate anisotropic diffusion of water molecules in the body, and its definition is based on the diffusion equation as

$$f(\mathbf{g}) = \frac{1}{(2\pi)^{d/2} |\mathbf{D}|^{1/2}} \exp\left(-\frac{1}{2} \mathbf{g}^\top \mathbf{D}^{-1} \mathbf{g}\right), \quad (1)$$

where  $f(\mathbf{g})$  is a probability distribution of water molecules in directions  $\mathbf{g} \in \mathbb{R}^d$ , and  $\mathbf{D}$  is a positive semi-definite matrix that represents diffusion strength of the distribution  $f(\mathbf{g})$  along or between directions  $\mathbf{g}$ . To the best of our knowledge, on the basis of  $f(\mathbf{g})$ , FA is defined in 3D case but we generalize it for multi-dimensional case as

$$FA := \sqrt{\frac{d}{d-1}} \cdot \frac{\sqrt{\sum_{i=1}^d (\lambda_i - \bar{\lambda})^2}}{\sqrt{\sum_{i=1}^d \lambda_i^2}}, \quad (2)$$

where  $(\lambda_1, \dots, \lambda_d)$  are eigenvalues of  $\mathbf{D}$  and  $\bar{\lambda} = \frac{1}{d} \sum_{i=1}^d \lambda_i$ . The eigenvalues of  $\mathbf{D}$  indicate diffusion strength to the direction of eigenvectors in original directions  $\mathbf{g}$ .  $\sqrt{\frac{d}{d-1}}$  normalizes the FA value between 0 and 1.

For intuitive interpretation of FA, we attempt to rewrite the definition of FA (2) in the next section.

## 2 Intuitive Interpretation of FA

**Lemma 1.**

$$\sum_{i=1}^d (\lambda_i - \bar{\lambda})^2 = \sum_{i=1}^d \lambda_i^2 - d \cdot \bar{\lambda}^2, \quad (3)$$

where  $\bar{\lambda} = \frac{1}{d} \sum_{i=1}^d \lambda_i$ .

*Proof.*

$$\begin{aligned}
\sum_{i=1}^d (\lambda_i - \bar{\lambda})^2 &= \sum_{i=1}^d \lambda_i^2 - 2 \cdot \left( \sum_{i=1}^d \lambda_i \right) \cdot \bar{\lambda} + d \cdot \bar{\lambda}^2 \\
&= \sum_{i=1}^d \lambda_i^2 - 2 \cdot d \cdot \bar{\lambda}^2 + d \cdot \bar{\lambda}^2 \\
&= \sum_{i=1}^d \lambda_i^2 - d \cdot \bar{\lambda}^2
\end{aligned}$$

□

**Lemma 2.** Let  $\theta$  be the angle between two vectors,  $(\lambda_1, \dots, \lambda_d), (1, 1, \dots, 1) \in \mathbb{R}^d$ . Then,

$$\sin \theta = \sqrt{\frac{\sum_{i=1}^d (\lambda_i - \bar{\lambda})^2}{\sum_{i=1}^d \lambda_i^2}}. \quad (4)$$

*Proof.* From the relationship between inner product and norms of two vectors, we get

$$\cos \theta = \frac{\sum_{i=1}^d \lambda_i}{\sqrt{\sum_{i=1}^d \lambda_i^2} \cdot \sqrt{\sum_{i=1}^d 1}} = \frac{\sum_{i=1}^d \lambda_i}{\sqrt{\sum_{i=1}^d \lambda_i^2} \cdot \sqrt{d}}.$$

Because  $D$  is positive semi-definite and so the vector  $(\lambda_1, \dots, \lambda_d)$  is in the first quadrant,  $\sin \theta > 0$  holds. As a result, we can rewrite  $\sin \theta$  as follows:

$$\begin{aligned}
\sin \theta &= \sqrt{1 - \cos^2 \theta} \\
&= \sqrt{1 - \frac{\left( \sum_{i=1}^d \lambda_i \right)^2}{\left( \sum_{i=1}^d \lambda_i^2 \right) \cdot d}} = \sqrt{1 - \frac{\bar{\lambda}^2 \cdot d^2}{\left( \sum_{i=1}^d \lambda_i^2 \right) \cdot d}} = \sqrt{\frac{\sum_{i=1}^d \lambda_i^2 - \bar{\lambda}^2 \cdot d}{\sum_{i=1}^d \lambda_i^2}} \\
&= \sqrt{\frac{\sum_{i=1}^d (\lambda_i - \bar{\lambda})^2}{\sum_{i=1}^d \lambda_i^2}} \quad (\because (3)).
\end{aligned}$$

□

**Proposition 1.**

$$FA = \sqrt{\frac{d}{d-1}} \cdot \sin \theta,$$

where  $\theta$  is defined in Lemma 2.

*Proof.* Trivial from (2) and (4).  $\square$

Proposition 1 implies that FA purely evaluates the degree of match between the eigenvalues without depending on the magnitude of them. Since the positive semi-definite matrix of  $\mathbf{D}$  makes all the eigenvalues positive, if only one eigenvalue is high, which means anisotropic diffusion,  $\theta$  is maximum and FA value is 1, but if all the eigenvalues are equal, which means isotropic diffusion,  $\theta$  is 0 and FA value is 0 (Fig.1).

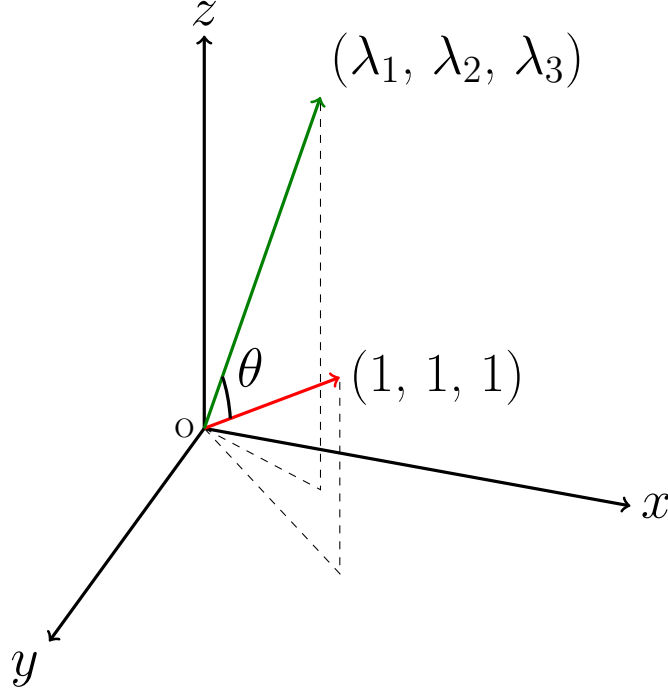

Figure 1: Intuitive interpretation of FA in 3D case. FA is proportional to  $\sin\theta$ , where  $\theta$  is the angle between two vectors,  $(\lambda_1, \lambda_2, \lambda_3)$  which are eigenvalues of  $\mathbf{D}$ ,  $(1, 1, 1)$ . If all the eigenvalues are equal such as  $(3, 3, 3)$ , which means isotropic diffusion,  $\theta$  is 0 and the FA value is 0. If only one eigenvalue is high such as  $(5, 0, 0)$ , which means anisotropic diffusion,  $\theta$  is maximum and the FA value is 1.
