# Supplementary material
Source: ML conference proceedings conference paper supplement (https://openaccess.thecvf.com/content/CVPR_2019/html/Takeda_Video_Magnification_in_CVPR_2019_paper.html)
Supplement: Supplementary file 2 [file Takeda_Video_Magnification_in_CVPR_2019_supplemental.zip]

Archive with 13 entries (13 files):
- 0435-supp/Proof_for_equiation(4)_in_our_paper.pdf
- 0435-supp/README.txt
- 0435-supp/Figure10_Syntheticball.mp4
- 0435-supp/Ukulele.mp4
- 0435-supp/Golf.mp4
- 0435-supp/Figure9_Tennis.mp4
- 0435-supp/Figure8_Gun.mp4
- 0435-supp/Figure7_Wood.mp4
- 0435-supp/Figure6_Face.mp4
- 0435-supp/Figure5_OurProposedMethod.mp4
- 0435-supp/Figure4_VisualizeFA.mp4
- 0435-supp/Figure1_Slamdunk.mp4
- 0435-supp/Drone.mp4
