# Supplementary material
Source: ML conference proceedings conference paper supplement (https://openaccess.thecvf.com/content/CVPR_2019/html/Takeda_Video_Magnification_in_CVPR_2019_paper.html)
Supplement: Supplementary file 2 [file Takeda_Video_Magnification_in_CVPR_2019_supplemental.zip › 0435-supp/README.txt]

#### Supplementary materials info ####

## Important ## 

Please watch each video in maximum window size of media player.

## Proof_for_equiation(4)_in_our_paper.pdf info ##

As we mentioned before in our paper, this pdf indicates the proof for intuitive interpretation of fractional anisotropy (FA) in our paper's section 3.2. (Eq.(4))

## video info ##

Codec: h265 (hevc (Main) (hev1 / 0x31766568))

I tested to open the supplementary video in VLC media player.
